# Supplementary material for: Osmoprotective Transcription Factor NFAT5/TonEBP Modulates Nuclear Factor-κB Activity
Source: PubMed Central journal article supplement — Mol Biol Cell. 2010 Oct 1;21(19):3459–74. doi: 10.1091/mbc.E10-02-0133 (PMC2947481; doi:10.1091/mbc.e10-02-0133), 2010-10-01
Supplement: E10-02-0133_1.pdf [file E10-02-0133_1.pdf]

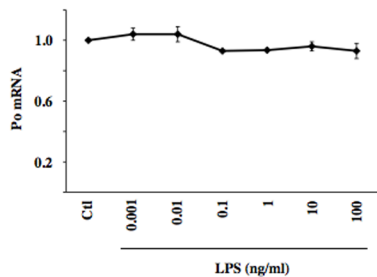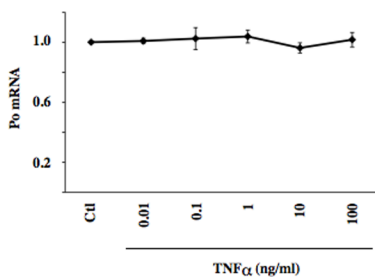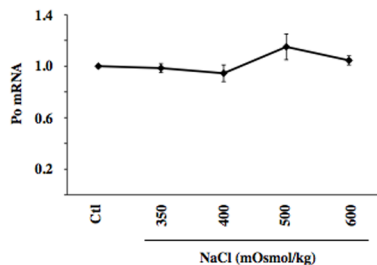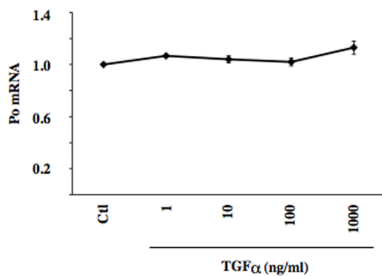

Figure S1: Supplementary data to Figure 1. Real-Time PCR analysis of  $P_0$  transcript illustrating  $P_0$  invariance in response to LPS,  $TNF\alpha$ , NaCl-hypertonicity and  $TGF\alpha$ .

Figure 2

|                | TNF $\alpha$    | MCP-1           | I $\kappa$ B $\alpha$ | AR              | BGT1            | SMIT            |
|----------------|-----------------|-----------------|-----------------------|-----------------|-----------------|-----------------|
| Ctl/SB203580   | 0.4 $\pm$ 0.05  | 0.75 $\pm$ 0.04 | 1.31 $\pm$ 0.16       | 0.85 $\pm$ 0.05 | 1.02 $\pm$ 0.15 | 0.87 $\pm$ 0.05 |
| Ctl/Uo126      | 0.58 $\pm$ 0.08 | 1.04 $\pm$ 0.11 | 1.32 $\pm$ 0.27       | 0.95 $\pm$ 0.08 | 0.95 $\pm$ 0.05 | 0.67 $\pm$ 0.03 |
| Ctl/SP600125   | 0.83 $\pm$ 0.03 | 0.9 $\pm$ 0.13  | 1.21 $\pm$ 0.09       | 1.08 $\pm$ 0.05 | 0.75 $\pm$ 0.11 | 1.3 $\pm$ 0.2   |
| Ctl/c-Jun RNAi | 1.2 $\pm$ 0.1   | 0.98 $\pm$ 0.15 | 1.15 $\pm$ 0.15       | -               | -               | -               |

Figure 5

|                | TNF $\alpha$    | MCP-1           | I $\kappa$ B $\alpha$ |
|----------------|-----------------|-----------------|-----------------------|
| Ctl/MyD88 RNAi | 0.55 $\pm$ 0.18 | 0.95 $\pm$ 0.07 | 0.77 $\pm$ 0.05       |
| Ctl/TNFR RNAi  | 0.92 $\pm$ 0.31 | 0.88 $\pm$ 0.21 | 0.91 $\pm$ 0.16       |
| Ctl/AG 1478    | 0.82 $\pm$ 0.2  | 1.2 $\pm$ 0.12  | 0.89 $\pm$ 0.05       |

Figure 6

| Ctl             | TNF $\alpha$    | MCP-1           | I $\kappa$ B $\alpha$ | AR              | BGT1            | SMIT            |
|-----------------|-----------------|-----------------|-----------------------|-----------------|-----------------|-----------------|
| Ctl/AG 1478     | 0.82 $\pm$ 0.2  | 1.2 $\pm$ 0.12  | 0.89 $\pm$ 0.05       | 1.13 $\pm$ 0.32 | 2.99 $\pm$ 0.13 | 1.05 $\pm$ 0.3  |
| Ctl/Wortmannin  | 2.05 $\pm$ 0.34 | 1.26 $\pm$ 0.14 | 1.0 $\pm$ 0.04        | 1.2 $\pm$ 0.21  | 1.14 $\pm$ 0.16 | 1.34 $\pm$ 0.27 |
| Ctl/Triciribine | 0.56 $\pm$ 0.06 | 1.68 $\pm$ 0.3  | 1.21 $\pm$ 0.12       | 0.54 $\pm$ 0.02 | 0.55 $\pm$ 0.19 | 0.56 $\pm$ 0.1  |
| Ctl/SB203580    | 0.47 $\pm$ 0.15 | 0.8 $\pm$ 0.1   | 1.2 $\pm$ 0.12        | 0.69 $\pm$ 0.04 | 0.71 $\pm$ 0.19 | 0.55 $\pm$ 0.05 |

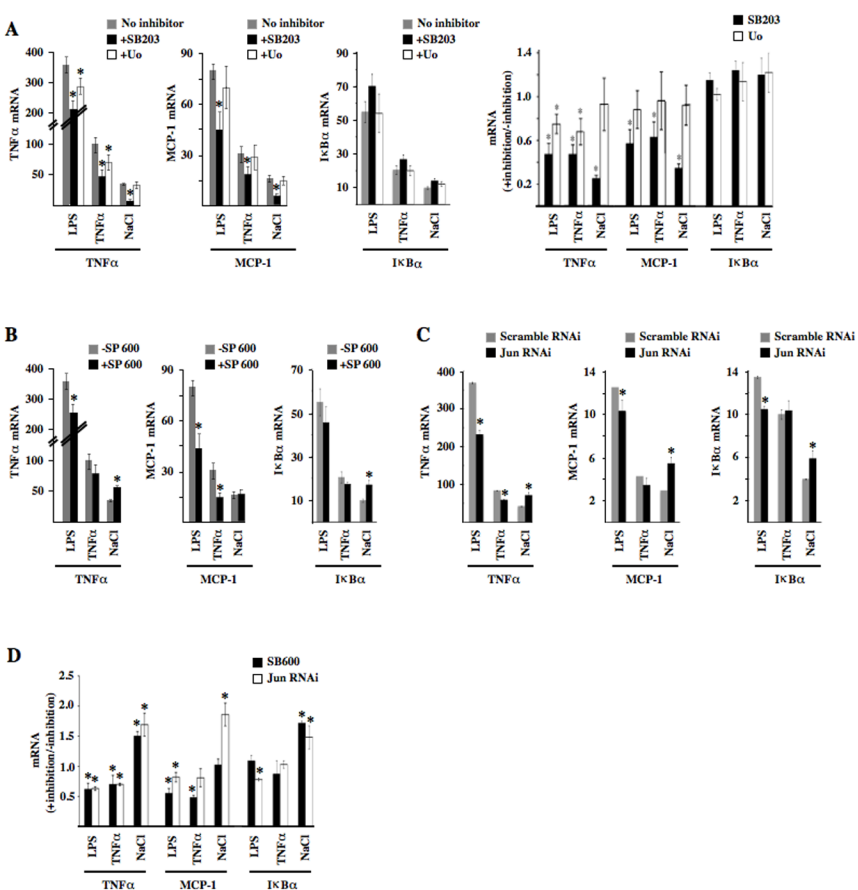

**Figure S3:** Supplementary data to Figure 2. (A) Comparison of the effects of 10  $\mu$ M SB203580 and 10  $\mu$ M U0126 on TNF $\alpha$ , MCP-1 and I $\kappa$ B $\alpha$  mRNA expression levels in cells challenged with LPS, TNF $\alpha$  or hypertonic medium (NaCl). Data is represented as fold decrease of inducible mRNA expression by pharmacological inhibitors. The ratio of mRNA transcripts in the presence and absence of each inhibitor is shown at far right. Notice the absence of an effect by SB203580 on I $\kappa$ B $\alpha$  mRNA induction by hypertonicity. (B and C) Comparison of the effects of 10  $\mu$ M SP600125 (B) and RNAi against c-Jun (C) on TNF $\alpha$ , MCP-1 and I $\kappa$ B $\alpha$  mRNA expression levels. Data is represented as fold decrease of inducible mRNA expression by pharmacological inhibitors or RNAi. The ratio of mRNA transcripts in the presence and absence SP600125 or RNAi is shown in (D).



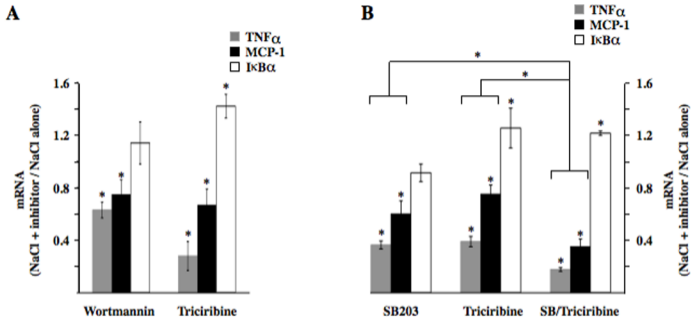

**Figure S5:** Supplementary data to Figure 6. **(A and B)** Comparison of the effects of 100 nM wortmannin, 30  $\mu$ M triciribine **(A)** or 10  $\mu$ M SB203580 and 30  $\mu$ M triciribine applied alone or together **(B)** on hypertonic stimulation (NaCl) of TNF $\alpha$ , MCP-1 and I $\kappa$ B $\alpha$  mRNA expression. Data is represented as the ratio of transcript expression induced by hypertonic challenge in the presence and absence of pharmacological inhibitors. Notice the absence of an inhibitory effect by any pharmacological compound on hypertonicity-induced I $\kappa$ B $\alpha$  mRNA expression.
